# Supplementary material
Source: Springer Nature journal article supplement (https://www.springermedizin.de/resource/supplementary/12884_2014_1101_MOESM2_ESM.pdf/9458924)
Supplement: MOESM2 [file 9458924]

## Round 2

48 statements on quality criteria  
4 statements on competencies

### Consensus:

31 statement on quality criteria  
4 statements on competencies

### No consensus:

17 statements on quality criteria

## Round 3

4 statements repeated  
6 statements repeated with minor adjustments  
1 statement adjusted into 2 new statements  
5 statement adjusted into 15 new statements  
1 statement dropped  
1 new statement

### Consensus:

14 statements on quality criteria  
(of which 4 statements almost)

### No consensus:

14 statements on quality criteria
